# Supplementary material
Source: publisher figshare collection journal article supplement (https://sage.figshare.com/ndownloader/files/20375877)
Supplement: Supplementary file 1 [file 20375877]

Appendix A. Correlation Matrix of Dietary and Drinking Measures <sup>a</sup>

|                           | <b>Fruits/<br/>Vegetables</b> | <b>Red Meat</b> | <b>Olive Oil</b> | <b>Whole<br/>Grains</b> | <b>Fried<br/>Food</b> | <b>Daily<br/>Drinking</b> |
|---------------------------|-------------------------------|-----------------|------------------|-------------------------|-----------------------|---------------------------|
| <b>Fruits/ Vegetables</b> | 1.00                          |                 |                  |                         |                       |                           |
| <b>Red Meat</b>           | 0.11                          | 1.00            |                  |                         |                       |                           |
| <b>Olive Oil</b>          | 0.28                          | 0.14            | 1.00             |                         |                       |                           |
| <b>Whole Grains</b>       | 0.17                          | 0.07            | 0.20             | 1.00                    |                       |                           |
| <b>Fried Food</b>         | 0.16                          | 0.36            | 0.17             | 0.12                    | 1.00                  |                           |
| <b>Daily Drinking</b>     | 0.05                          | 0.04            | -0.06            | 0.04                    | -0.04                 | 1.00                      |

<sup>a</sup> N = 1298

Appendix B. Correlation Matrix of Social Integration Measures <sup>a</sup>

|                                 | <b>No<br/>Confidant</b> | <b>Married</b> | <b>Employed</b> | <b>Informal<br/>Integration</b> | <b>Church<br/>Attendance</b> |
|---------------------------------|-------------------------|----------------|-----------------|---------------------------------|------------------------------|
| <b>No Confidant</b>             | 1.00                    |                |                 |                                 |                              |
| <b>Married</b>                  | -0.05                   | 1.00           |                 |                                 |                              |
| <b>Employed</b>                 | -0.05                   | 0.13           | 1.00            |                                 |                              |
| <b>Informal<br/>Integration</b> | -0.10                   | 0.03           | 0.10            | 1.00                            |                              |
| <b>Church<br/>Attendance</b>    | -0.11                   | 0.00           | -0.07           | 0.06                            | 1.00                         |

<sup>a</sup> N = 1302

Appendix C. Average Marginal Effects (AMEs) of Social Integration Mediators on Dietary and Drinking Practices in Older US Adults (50+)  
a, b, c, d

|                                  |                        | <b>No Confidant</b> |   | <b>Married</b> |   | <b>Employed</b> |   | <b>Informal<br/>Integration</b> | <b>Church<br/>Attendance</b> |
|----------------------------------|------------------------|---------------------|---|----------------|---|-----------------|---|---------------------------------|------------------------------|
| <b>Fruits and<br/>Vegetables</b> | <i>5+ Srv</i>          | -0.018              |   | 0.027          |   | -0.005          |   | 0.016                           | *                            |
|                                  |                        | (0.023)             |   | (0.017)        |   | (0.023)         |   | (0.007)                         |                              |
|                                  | <i>3-4 Srv</i>         | -0.015              |   | 0.022          |   | -0.004          |   | 0.013                           | *                            |
|                                  |                        | (0.021)             |   | (0.016)        |   | (0.018)         |   | (0.006)                         |                              |
|                                  | <i>1-2 Srv</i>         | 0.029               |   | -0.042         |   | 0.008           |   | -0.025                          | *                            |
|                                  |                        | (0.038)             |   | (0.028)        |   | (0.035)         |   | (0.012)                         |                              |
|                                  | <i>None</i>            | 0.005               |   | -0.007         |   | 0.001           |   | -0.004                          | *                            |
|                                  |                        | (0.006)             |   | (0.005)        |   | (0.005)         |   | (0.002)                         |                              |
| <b>Olive Oil</b>                 | <i>Almost Everyday</i> | -0.068              | * | 0.074          | * | -0.019          |   | 0.031                           | *                            |
|                                  |                        | (0.019)             |   | (0.026)        |   | (0.023)         |   | (0.011)                         |                              |
|                                  | <i>Most Days</i>       | -0.025              | * | 0.024          | * | -0.006          |   | 0.010                           | *                            |
|                                  |                        | (0.009)             |   | (0.009)        |   | (0.007)         |   | (0.004)                         |                              |
|                                  | <i>Some Days</i>       | -0.010              |   | 0.004          |   | 0.000           |   | 0.000                           |                              |
|                                  |                        | (0.007)             |   | (0.005)        |   | (0.001)         |   | (0.002)                         |                              |
|                                  | <i>Rarely/ Never</i>   | 0.102               | * | -0.102         | * | 0.024           |   | -0.041                          | *                            |
|                                  |                        | (0.034)             |   | (0.038)        |   | (0.029)         |   | (0.014)                         |                              |
| <b>Whole Grains</b>              | <i>Almost Everyday</i> | 0.030               |   | 0.073          |   | -0.113          | * | -0.002                          |                              |
|                                  |                        | (0.044)             |   | (0.044)        |   | (0.038)         |   | (0.020)                         |                              |
|                                  | <i>Most Days</i>       | -0.003              |   | -0.005         |   | 0.010           | * | 0.000                           |                              |
|                                  |                        | (0.005)             |   | (0.003)        |   | (0.004)         |   | (0.002)                         |                              |
|                                  | <i>Some Days</i>       | -0.017              |   | -0.040         |   | 0.062           | * | 0.001                           |                              |
|                                  |                        | (0.024)             |   | (0.024)        |   | (0.021)         |   | (0.011)                         |                              |
|                                  | <i>Rarely/ Never</i>   | -0.011              |   | -0.028         |   | 0.042           | * | 0.001                           |                              |
|                                  |                        | (0.015)             |   | (0.018)        |   | (0.015)         |   | (0.007)                         |                              |

Appendix C (continued). Average Marginal Effects (AMEs) of Social Integration Mediators on Dietary and Drinking Practices in Older US Adults (50+) <sup>a, b, c, d</sup>

|                 |               | No Confidant |         | Married |         | Employed |         | Informal Integration |         | Church Attendance |   |
|-----------------|---------------|--------------|---------|---------|---------|----------|---------|----------------------|---------|-------------------|---|
| Fried Foods     | Rarely/ Never | 0.041        |         | -0.001  |         | 0.032    |         | 0.012                |         | -0.005            |   |
|                 |               | (0.052)      |         | (0.037) |         | (0.037)  |         | (0.017)              |         | (0.009)           |   |
|                 | Some Days     | -0.026       |         | 0.001   |         | -0.020   |         | -0.008               |         | 0.003             |   |
|                 |               | (0.034)      |         | (0.023) |         | (0.022)  |         | (0.010)              |         | (0.006)           |   |
|                 | Most Days     | -0.007       |         | 0.000   |         | -0.006   |         | -0.002               |         | 0.001             |   |
|                 |               | (0.009)      |         | (0.007) |         | (0.006)  |         | (0.003)              |         | (0.002)           |   |
| Almost Everyday | -0.008        |              | 0.000   |         | -0.007  |          | -0.003  |                      | 0.001   |                   |   |
|                 | (0.010)       |              | (0.008) |         | (0.008) |          | (0.004) |                      | (0.002) |                   |   |
| Red Meat        | Rarely/ Never | -0.006       |         | -0.056  | *       | 0.050    | *       | -0.007               |         | 0.005             |   |
|                 |               | (0.031)      |         | (0.028) |         | (0.024)  |         | (0.012)              |         | (0.007)           |   |
|                 | Some Days     | -0.002       |         | -0.010  |         | 0.012    |         | -0.002               |         | 0.001             |   |
|                 |               | (0.008)      |         | (0.006) |         | (0.007)  |         | (0.003)              |         | (0.002)           |   |
|                 | Most Days     | 0.004        |         | 0.032   | *       | -0.029   | *       | 0.004                |         | -0.003            |   |
|                 |               | (0.018)      |         | (0.016) |         | (0.014)  |         | (0.007)              |         | (0.004)           |   |
| Almost Everyday | 0.004         |              | 0.035   | *       | -0.033  | *        | 0.004   |                      | -0.004  |                   |   |
|                 | (0.022)       |              | (0.017) |         | (0.016) |          | (0.008) |                      | (0.004) |                   |   |
| Daily Drinking  | 30+/mo        | -0.113       | *       | -0.014  |         | -0.009   |         | 0.025                |         | -0.041            | * |
|                 |               | (0.035)      |         | (0.030) |         | (0.030)  |         | (0.016)              |         | (0.007)           |   |

<sup>a</sup> N = 1300 (fruits/ vegetables, olive oil); 1302 (whole grains, fried food, red meat, drinking)

<sup>b</sup> AMEs calculated from ordered logistic (linear probability for drinking) models adjusted for race, age, gender, SES, health status, discrimination, and all social integration measures.

<sup>c</sup> Coefficients represent the average marginal effect of a positive response (no confidant, married, employed measures) or 1-unit increase (informal integration, church attendance) for each category; standard errors are beneath each coefficient in parentheses

<sup>d</sup> \* p<.05
